# Supplementary material
Source: HighWire-hosted journal article supplement (http://rc.rcjournal.com/highwire/filestream/28335/field_highwire_adjunct_files/1/rc-11781-File005.docx)
Supplement: rc-11781-File005.docx [file rc-11781-File005.docx]

**Supplement 2.** Full search strategy

| **Database** | **Search strategy** | **Search location** | **Article number** |
| --- | --- | --- | --- |
| **MEDLINE via PubMed** | (("Ventilators, Mechanical"[Mesh] OR "Mechanical Ventilator*"[tiab] OR "Pulmonary Ventilator*"[tiab] OR "Ventilator, Pulmonary*"[tiab] OR "Intensive care units"[Mesh] OR "Intensive Care Unit*"[tiab] OR "Critical Care"[Mesh]) AND ("Patient Positioning"[Mesh] OR "Automatic patient positioning" OR "Continuous lateral rotation therapy" OR "Lateral rotation therapy" OR "Kinetic therapy" OR "Kinetic bed therapy" OR "Continuous rotational therapy" OR "Lateral change Positioning" OR "Automated lateral rotation" OR "Continuous mechanical turning" OR "Continuous axial rotation" OR "kinetic positioning" OR "Continuous oscillation therapy" OR "Kinetic Treatment Table" OR "oscillating bed" OR "rotating bed")) AND ("Randomized Controlled Trial" OR "Controlled Clinical Trial" OR "Non-randomized controlled trials as topic" OR "Quasi-experimental studies" OR "Quasi experimental studies" OR "Quasi-experimental study") | All fields | 106 |
| **EMBASE** | ('ventilators, mechanical'/exp OR 'ventilators, mechanical' OR 'mechanical ventilator'/exp OR 'mechanical ventilator' OR 'pulmonary ventilator'/exp OR 'pulmonary ventilator' OR 'ventilator, pulmonary'/exp OR 'ventilator, pulmonary' OR 'intensive care units'/exp OR 'intensive care units' OR 'intensive care unit'/exp OR 'intensive care unit' OR 'critical care'/exp OR 'critical care') AND ('Patient positioning' OR 'automatic patient positioning' OR 'continuous lateral rotation therapy' OR 'lateral rotation therapy' OR 'kinetic therapy' OR 'kinetic bed therapy' OR 'continuous rotational therapy' OR 'lateral change positioning' OR 'automated lateral rotation' OR 'continuous mechanical turning' OR 'continuous axial rotation' OR 'kinetic positioning' OR 'continuous oscillation therapy' OR 'kinetic treatment table' OR 'oscillating bed' OR 'rotating bed') AND ('randomized controlled trial'/exp OR 'randomized controlled trial' OR 'controlled clinical trial'/exp OR 'controlled clinical trial' OR 'quasi experimental study'/exp OR 'quasi experimental study') | All fields | 335 |
| **SciVerse SCOPUS** | ( TITLE-ABS-KEY ( "Ventilators, Mechanical" OR "Mechanical Ventilator" OR "Pulmonary Ventilator" OR "Ventilator, Pulmonary" OR "Intensive care units" OR "Intensive Care Unit" OR "Critical care" ) AND TITLE-ABS-KEY ( "Patient positioning" OR “Automatic patient positioning" OR "Continuous lateral rotation therapy" OR "Lateral rotation therapy" OR "Kinetic therapy" OR "Kinetic bed therapy" OR "Continuous rotational therapy" OR "Lateral change Positioning" OR "Automated lateral rotation" OR "Continuous mechanical turning" OR "Continuous axial rotation" OR "kinetic positioning" OR "Continuous oscillation therapy" OR "Kinetic Treatment Table" OR "oscillating bed" OR "rotating bed" ) AND TITLE-ABS-KEY ( "Randomized Controlled Trial" OR "Controlled Clinical Trial" OR "non-randomized controlled trials was topic" ) ) | Title, abstract and keywords | 201 |
| **SCIENCE DIRECT** | (“Ventilators, Mechanical" OR “Intensive care units" OR “Critical Care") AND ("Patient positioning" OR "Continuous lateral rotation therapy" OR "Kinetic therapy" OR “kinetic positioning” OR “Continuous mechanical turning” OR "Lateral rotation therapy") | Title, abstract and keywords | 26 |
| **COCHRANE LIBRARY** | ((“Ventilators, Mechanical" OR “Mechanical Ventilator” OR “Pulmonary Ventilator” OR “Ventilator, Pulmonary” OR “Intensive care units" OR “Intensive Care Unit” OR “Critical Care”)):ti,ab,kw AND (("Patient positioning" OR "Automatic patient positioning" OR "Continuous lateral rotation therapy" OR "Lateral rotation therapy" OR "Kinetic therapy" OR "Kinetic bed therapy" OR "Continuous rotational therapy" OR "Lateral change Positioning" OR "Automated lateral rotation" OR “Continuous mechanical turning” OR “Continuous axial rotation” OR “kinetic positioning” OR “Continuous oscillation therapy“ OR “Kinetic Treatment Table” OR “oscillating bed” OR “rotating bed”)):ti,ab,kw AND ((“Randomized Controlled Trial” OR "controlled study" OR "Controlled Clinical Trial" OR “Non-randomized controlled trials as topic”)):ti,ab,kw | Title, abstract and keywords | 25 |
| **Cumulative Index to Nursing and Allied Health Literature (CINAHL) via EBSCOhost** | TX ( “Ventilators, Mechanical" OR “Mechanical Ventilator” OR “Pulmonary Ventilator” OR “Ventilator, Pulmonary” OR “Intensive care units" OR “Intensive Care Unit” ) AND TX ( "Patient positioning" OR "Automatic patient positioning" OR "Continuous lateral rotation therapy" OR "Lateral rotation therapy" OR "Kinetic therapy" OR "Kinetic bed therapy" OR "Continuous rotational therapy" OR "Lateral change Positioning" OR "Automated lateral rotation" OR “Continuous mechanical turning” OR “Continuous axial rotation” OR “kinetic positioning” OR “Continuous oscillation therapy“ OR “Kinetic Treatment Table” OR “oscillating bed” OR “rotating bed” ) AND TX ( "Randomized Controlled Trial” OR "Controlled Clinical Trial” OR “Non-randomized controlled trials as topic” OR “Quasi-experimental studies” OR “Quasi experimental studies” OR “Quasi-experimental study” ) | All fields | 187 |
| **WEB OF SCIENCE** | ((ALL=(“Ventilators, Mechanical" OR “Mechanical Ventilator” OR “Pulmonary Ventilator” OR “Ventilator, Pulmonary” OR “Intensive care units" OR “Intensive Care Unit” OR “Critical Care” )) AND ALL=("Patient positioning" OR "Automatic patient positioning" OR "Continuous lateral rotation therapy" OR "Lateral rotation therapy" OR "Kinetic therapy" OR "Kinetic bed therapy" OR "Continuous rotational therapy" OR "Lateral change Positioning" OR "Automated lateral rotation" OR “Continuous mechanical turning” OR “Continuous axial rotation” OR “kinetic positioning” OR “Continuous oscillation therapy“ OR “Kinetic Treatment Table” OR “oscillating bed” OR “rotating bed” )) AND ALL=("Randomized Controlled Trial” OR "Controlled Clinical Trial” OR “Non-randomized controlled trials as topic” OR “Quasi-experimental study") | All fields | 11 |
